# Supplementary material for: Exploration of the “larval pool”: development and ground-truthing of a larval transport model off leeward Hawai‘i
Source: PeerJ. 2016 Feb 1;4:e1636. doi: 10.7717/peerj.1636 (PMC4741072; doi:10.7717/peerj.1636)
Supplement: Supplemental Information 1 [file peerj-04-1636-s001.xlsx]

## Sheet: ForecastGAMinput
Trawl Number	Station	Longitude	Latitude	Moon Phase	Moon Angle	Observed Acanthurid abundances	Simulated Acanthurid abundances
1	1	203.5	19.65	4.5377	36.8481	5	1312
2	1	203.467	19.6333	5.35201	58.1695	10	1863
3	2	203.867	19.6667	10.3831	24.9588	1	786
4	2	203.867	19.6667	11.8793	52.8856	0	1401
5	3	203.8	19.9833	18.3505	12.7322	0	180
6	3	203.8	19.9667	19.8584	45.4089	0	491
7	4	204.026	20.0127	28.0353	0.6899	1	70
8	4	204.009	20.024	29.7807	35.5545	0	61
9	5	203.853	19.2975	38.9095	0	7	2341
10	5	203.859	19.303	40.7957	24.7771	5	2065
11	6	203.487	19.347	50.3681	0	4	459
12	6	203.469	19.3367	52.2901	13.5962	8	506
13	7	203.539	19.5003	61.7754	0	6	408
14	7	203.511	19.4498	63.6273	2.47325	4	323
15	8	204.167	19.3333	72.9327	0	1	0
16	8	204.079	19.3302	74.191	0	0	229
17	9	203.984	19.5277	81.9989	0	0	283
18	9	203.981	19.5308	83.4244	0	2	339
19	10	203.812	19.8611	89.7676	0	0	1193
20	10	203.833	19.8333	90.8681	0	0	697
21	11	203.639	19.9868	95.4611	0	0	951
22	11	203.637	19.9882	96.1915	0	0	644
