# Supplementary material for: Exploration of the “larval pool”: development and ground-truthing of a larval transport model off leeward Hawai‘i
Source: PeerJ. 2016 Feb 1;4:e1636. doi: 10.7717/peerj.1636 (PMC4741072; doi:10.7717/peerj.1636)
Supplement: Supplemental Information 2 — Depth strata refers to the five depth bins that we used, where depth strata 1 = surface layer, 2 = 50 m depth layer, 3 = 100 m depth layer, 4 = 0–50 m averaged, and 5 = 0–100 m averaged. Pelagic larval durations (PLD) are in days. [file peerj-04-1636-s002.xlsx]

## Sheet: HindcastGAMinput
Trawl Number	Longitude	Latitude	Simulated Settlers	Depth Strata	PLD
1	203.5	19.65	307	1	15
2	203.47	19.63	7	1	15
3	203.87	19.67	11	1	15
4	203.87	19.67	25	1	15
5	203.8	19.98	16	1	15
6	203.8	19.97	17	1	15
7	204.03	20.01	20	1	15
9	203.85	19.3	18	1	15
10	203.86	19.3	12	1	15
11	203.49	19.35	0	1	15
12	203.47	19.34	0	1	15
13	203.54	19.5	0	1	15
14	203.51	19.45	0	1	15
15	204.17	19.33	1	1	15
16	204.08	19.33	7	1	15
17	203.98	19.53	0	1	15
18	203.98	19.53	1	1	15
19	203.81	19.86	2	1	15
20	203.83	19.83	4	1	15
21	203.64	19.99	6	1	15
22	203.64	19.99	1	1	15
1	203.5	19.65	12	1	30
2	203.47	19.63	0	1	30
3	203.87	19.67	1	1	30
4	203.87	19.67	5	1	30
5	203.8	19.98	3	1	30
6	203.8	19.97	2	1	30
7	204.03	20.01	1	1	30
9	203.85	19.3	1	1	30
10	203.86	19.3	2	1	30
11	203.49	19.35	0	1	30
12	203.47	19.34	0	1	30
13	203.54	19.5	0	1	30
14	203.51	19.45	0	1	30
15	204.17	19.33	1	1	30
16	204.08	19.33	0	1	30
17	203.98	19.53	2	1	30
18	203.98	19.53	1	1	30
19	203.81	19.86	0	1	30
20	203.83	19.83	1	1	30
21	203.64	19.99	1	1	30
22	203.64	19.99	0	1	30
1	203.5	19.65	1	1	45
2	203.47	19.63	0	1	45
3	203.87	19.67	0	1	45
4	203.87	19.67	0	1	45
5	203.8	19.98	0	1	45
6	203.8	19.97	0	1	45
7	204.03	20.01	0	1	45
9	203.85	19.3	0	1	45
10	203.86	19.3	0	1	45
11	203.49	19.35	0	1	45
12	203.47	19.34	0	1	45
13	203.54	19.5	0	1	45
14	203.51	19.45	0	1	45
15	204.17	19.33	0	1	45
16	204.08	19.33	0	1	45
17	203.98	19.53	0	1	45
18	203.98	19.53	0	1	45
19	203.81	19.86	0	1	45
20	203.83	19.83	0	1	45
21	203.64	19.99	0	1	45
22	203.64	19.99	0	1	45
1	203.5	19.65	0	1	60
2	203.47	19.63	0	1	60
3	203.87	19.67	0	1	60
4	203.87	19.67	0	1	60
5	203.8	19.98	1	1	60
6	203.8	19.97	0	1	60
7	204.03	20.01	0	1	60
9	203.85	19.3	0	1	60
10	203.86	19.3	0	1	60
11	203.49	19.35	0	1	60
12	203.47	19.34	0	1	60
13	203.54	19.5	0	1	60
14	203.51	19.45	0	1	60
15	204.17	19.33	0	1	60
16	204.08	19.33	0	1	60
17	203.98	19.53	0	1	60
18	203.98	19.53	0	1	60
19	203.81	19.86	0	1	60
20	203.83	19.83	0	1	60
21	203.64	19.99	0	1	60
22	203.64	19.99	0	1	60
1	203.5	19.65	0	1	75
2	203.47	19.63	0	1	75
3	203.87	19.67	0	1	75
4	203.87	19.67	0	1	75
5	203.8	19.98	0	1	75
6	203.8	19.97	0	1	75
7	204.03	20.01	0	1	75
9	203.85	19.3	0	1	75
10	203.86	19.3	0	1	75
11	203.49	19.35	0	1	75
12	203.47	19.34	0	1	75
13	203.54	19.5	0	1	75
14	203.51	19.45	0	1	75
15	204.17	19.33	0	1	75
16	204.08	19.33	0	1	75
17	203.98	19.53	0	1	75
18	203.98	19.53	0	1	75
19	203.81	19.86	0	1	75
20	203.83	19.83	0	1	75
21	203.64	19.99	0	1	75
22	203.64	19.99	0	1	75
1	203.5	19.65	480	2	15
2	203.47	19.63	660	2	15
3	203.87	19.67	110	2	15
4	203.87	19.67	128	2	15
5	203.8	19.98	84	2	15
6	203.8	19.97	165	2	15
7	204.03	20.01	37	2	15
9	203.85	19.3	45	2	15
10	203.86	19.3	43	2	15
11	203.49	19.35	0	2	15
12	203.47	19.34	0	2	15
13	203.54	19.5	8	2	15
14	203.51	19.45	6	2	15
15	204.17	19.33	19	2	15
16	204.08	19.33	18	2	15
17	203.98	19.53	2	2	15
18	203.98	19.53	7	2	15
19	203.81	19.86	0	2	15
20	203.83	19.83	0	2	15
21	203.64	19.99	5	2	15
22	203.64	19.99	19	2	15
1	203.5	19.65	45	2	30
2	203.47	19.63	50	2	30
3	203.87	19.67	32	2	30
4	203.87	19.67	43	2	30
5	203.8	19.98	44	2	30
6	203.8	19.97	39	2	30
7	204.03	20.01	11	2	30
9	203.85	19.3	28	2	30
10	203.86	19.3	38	2	30
11	203.49	19.35	0	2	30
12	203.47	19.34	0	2	30
13	203.54	19.5	4	2	30
14	203.51	19.45	2	2	30
15	204.17	19.33	32	2	30
16	204.08	19.33	28	2	30
17	203.98	19.53	52	2	30
18	203.98	19.53	59	2	30
19	203.81	19.86	7	2	30
20	203.83	19.83	9	2	30
21	203.64	19.99	20	2	30
22	203.64	19.99	24	2	30
1	203.5	19.65	11	2	45
2	203.47	19.63	8	2	45
3	203.87	19.67	2	2	45
4	203.87	19.67	7	2	45
5	203.8	19.98	3	2	45
6	203.8	19.97	8	2	45
7	204.03	20.01	6	2	45
9	203.85	19.3	6	2	45
10	203.86	19.3	15	2	45
11	203.49	19.35	0	2	45
12	203.47	19.34	0	2	45
13	203.54	19.5	2	2	45
14	203.51	19.45	5	2	45
15	204.17	19.33	12	2	45
16	204.08	19.33	25	2	45
17	203.98	19.53	17	2	45
18	203.98	19.53	15	2	45
19	203.81	19.86	1	2	45
20	203.83	19.83	3	2	45
21	203.64	19.99	12	2	45
22	203.64	19.99	12	2	45
1	203.5	19.65	12	2	60
2	203.47	19.63	16	2	60
3	203.87	19.67	6	2	60
4	203.87	19.67	6	2	60
5	203.8	19.98	3	2	60
6	203.8	19.97	12	2	60
7	204.03	20.01	4	2	60
9	203.85	19.3	5	2	60
10	203.86	19.3	9	2	60
11	203.49	19.35	12	2	60
12	203.47	19.34	2	2	60
13	203.54	19.5	10	2	60
14	203.51	19.45	7	2	60
15	204.17	19.33	10	2	60
16	204.08	19.33	10	2	60
17	203.98	19.53	19	2	60
18	203.98	19.53	20	2	60
19	203.81	19.86	11	2	60
20	203.83	19.83	11	2	60
21	203.64	19.99	14	2	60
22	203.64	19.99	18	2	60
1	203.5	19.65	13	2	75
2	203.47	19.63	17	2	75
3	203.87	19.67	14	2	75
4	203.87	19.67	3	2	75
5	203.8	19.98	12	2	75
6	203.8	19.97	10	2	75
7	204.03	20.01	9	2	75
9	203.85	19.3	10	2	75
10	203.86	19.3	7	2	75
11	203.49	19.35	0	2	75
12	203.47	19.34	0	2	75
13	203.54	19.5	0	2	75
14	203.51	19.45	0	2	75
15	204.17	19.33	3	2	75
16	204.08	19.33	3	2	75
17	203.98	19.53	10	2	75
18	203.98	19.53	6	2	75
19	203.81	19.86	1	2	75
20	203.83	19.83	1	2	75
21	203.64	19.99	8	2	75
22	203.64	19.99	4	2	75
1	203.5	19.65	324	3	15
2	203.47	19.63	556	3	15
3	203.87	19.67	206	3	15
4	203.87	19.67	377	3	15
5	203.8	19.98	626	3	15
6	203.8	19.97	608	3	15
7	204.03	20.01	589	3	15
9	203.85	19.3	252	3	15
10	203.86	19.3	307	3	15
11	203.49	19.35	1	3	15
12	203.47	19.34	2	3	15
13	203.54	19.5	145	3	15
14	203.51	19.45	150	3	15
15	204.17	19.33	340	3	15
16	204.08	19.33	408	3	15
17	203.98	19.53	691	3	15
18	203.98	19.53	740	3	15
19	203.81	19.86	78	3	15
20	203.83	19.83	75	3	15
21	203.64	19.99	836	3	15
22	203.64	19.99	827	3	15
1	203.5	19.65	138	3	30
2	203.47	19.63	201	3	30
3	203.87	19.67	154	3	30
4	203.87	19.67	146	3	30
5	203.8	19.98	199	3	30
6	203.8	19.97	193	3	30
7	204.03	20.01	182	3	30
9	203.85	19.3	120	3	30
10	203.86	19.3	115	3	30
11	203.49	19.35	0	3	30
12	203.47	19.34	0	3	30
13	203.54	19.5	45	3	30
14	203.51	19.45	46	3	30
15	204.17	19.33	117	3	30
16	204.08	19.33	142	3	30
17	203.98	19.53	179	3	30
18	203.98	19.53	223	3	30
19	203.81	19.86	112	3	30
20	203.83	19.83	116	3	30
21	203.64	19.99	260	3	30
22	203.64	19.99	257	3	30
1	203.5	19.65	56	3	45
2	203.47	19.63	66	3	45
3	203.87	19.67	74	3	45
4	203.87	19.67	105	3	45
5	203.8	19.98	121	3	45
6	203.8	19.97	131	3	45
7	204.03	20.01	98	3	45
9	203.85	19.3	78	3	45
10	203.86	19.3	104	3	45
11	203.49	19.35	0	3	45
12	203.47	19.34	0	3	45
13	203.54	19.5	34	3	45
14	203.51	19.45	47	3	45
15	204.17	19.33	98	3	45
16	204.08	19.33	79	3	45
17	203.98	19.53	137	3	45
18	203.98	19.53	130	3	45
19	203.81	19.86	60	3	45
20	203.83	19.83	34	3	45
21	203.64	19.99	134	3	45
22	203.64	19.99	145	3	45
1	203.5	19.65	83	3	60
2	203.47	19.63	76	3	60
3	203.87	19.67	77	3	60
4	203.87	19.67	79	3	60
5	203.8	19.98	104	3	60
6	203.8	19.97	109	3	60
7	204.03	20.01	81	3	60
9	203.85	19.3	93	3	60
10	203.86	19.3	98	3	60
11	203.49	19.35	1	3	60
12	203.47	19.34	0	3	60
13	203.54	19.5	22	3	60
14	203.51	19.45	30	3	60
15	204.17	19.33	60	3	60
16	204.08	19.33	53	3	60
17	203.98	19.53	79	3	60
18	203.98	19.53	69	3	60
19	203.81	19.86	36	3	60
20	203.83	19.83	18	3	60
21	203.64	19.99	65	3	60
22	203.64	19.99	66	3	60
1	203.5	19.65	63	3	75
2	203.47	19.63	64	3	75
3	203.87	19.67	68	3	75
4	203.87	19.67	70	3	75
5	203.8	19.98	60	3	75
6	203.8	19.97	69	3	75
7	204.03	20.01	61	3	75
9	203.85	19.3	51	3	75
10	203.86	19.3	58	3	75
11	203.49	19.35	0	3	75
12	203.47	19.34	0	3	75
13	203.54	19.5	18	3	75
14	203.51	19.45	11	3	75
15	204.17	19.33	30	3	75
16	204.08	19.33	33	3	75
17	203.98	19.53	64	3	75
18	203.98	19.53	43	3	75
19	203.81	19.86	26	3	75
20	203.83	19.83	18	3	75
21	203.64	19.99	39	3	75
22	203.64	19.99	47	3	75
1	203.5	19.65	477	4	15
2	203.47	19.63	131	4	15
3	203.87	19.67	65	4	15
4	203.87	19.67	59	4	15
5	203.8	19.98	90	4	15
6	203.8	19.97	47	4	15
7	204.03	20.01	94	4	15
9	203.85	19.3	87	4	15
10	203.86	19.3	82	4	15
11	203.49	19.35	0	4	15
12	203.47	19.34	0	4	15
13	203.54	19.5	0	4	15
14	203.51	19.45	0	4	15
15	204.17	19.33	3	4	15
16	204.08	19.33	15	4	15
17	203.98	19.53	1	4	15
18	203.98	19.53	2	4	15
19	203.81	19.86	0	4	15
20	203.83	19.83	0	4	15
21	203.64	19.99	1	4	15
22	203.64	19.99	1	4	15
1	203.5	19.65	34	4	30
2	203.47	19.63	5	4	30
3	203.87	19.67	0	4	30
4	203.87	19.67	4	4	30
5	203.8	19.98	3	4	30
6	203.8	19.97	11	4	30
7	204.03	20.01	2	4	30
9	203.85	19.3	0	4	30
10	203.86	19.3	6	4	30
11	203.49	19.35	0	4	30
12	203.47	19.34	0	4	30
13	203.54	19.5	0	4	30
14	203.51	19.45	0	4	30
15	204.17	19.33	4	4	30
16	204.08	19.33	7	4	30
17	203.98	19.53	7	4	30
18	203.98	19.53	5	4	30
19	203.81	19.86	0	4	30
20	203.83	19.83	0	4	30
21	203.64	19.99	5	4	30
22	203.64	19.99	0	4	30
1	203.5	19.65	5	4	45
2	203.47	19.63	1	4	45
3	203.87	19.67	0	4	45
4	203.87	19.67	0	4	45
5	203.8	19.98	2	4	45
6	203.8	19.97	0	4	45
7	204.03	20.01	1	4	45
9	203.85	19.3	0	4	45
10	203.86	19.3	0	4	45
11	203.49	19.35	0	4	45
12	203.47	19.34	0	4	45
13	203.54	19.5	0	4	45
14	203.51	19.45	0	4	45
15	204.17	19.33	0	4	45
16	204.08	19.33	2	4	45
17	203.98	19.53	0	4	45
18	203.98	19.53	2	4	45
19	203.81	19.86	0	4	45
20	203.83	19.83	0	4	45
21	203.64	19.99	0	4	45
22	203.64	19.99	0	4	45
1	203.5	19.65	16	4	60
2	203.47	19.63	5	4	60
3	203.87	19.67	5	4	60
4	203.87	19.67	4	4	60
5	203.8	19.98	5	4	60
6	203.8	19.97	7	4	60
7	204.03	20.01	10	4	60
9	203.85	19.3	6	4	60
10	203.86	19.3	9	4	60
11	203.49	19.35	0	4	60
12	203.47	19.34	0	4	60
13	203.54	19.5	0	4	60
14	203.51	19.45	0	4	60
15	204.17	19.33	1	4	60
16	204.08	19.33	3	4	60
17	203.98	19.53	5	4	60
18	203.98	19.53	1	4	60
19	203.81	19.86	0	4	60
20	203.83	19.83	0	4	60
21	203.64	19.99	0	4	60
22	203.64	19.99	0	4	60
1	203.5	19.65	6	4	75
2	203.47	19.63	5	4	75
3	203.87	19.67	5	4	75
4	203.87	19.67	0	4	75
5	203.8	19.98	2	4	75
6	203.8	19.97	0	4	75
7	204.03	20.01	3	4	75
9	203.85	19.3	1	4	75
10	203.86	19.3	2	4	75
11	203.49	19.35	0	4	75
12	203.47	19.34	0	4	75
13	203.54	19.5	1	4	75
14	203.51	19.45	0	4	75
15	204.17	19.33	2	4	75
16	204.08	19.33	0	4	75
17	203.98	19.53	3	4	75
18	203.98	19.53	1	4	75
19	203.81	19.86	0	4	75
20	203.83	19.83	0	4	75
21	203.64	19.99	0	4	75
22	203.64	19.99	0	4	75
1	203.5	19.65	341	5	15
2	203.47	19.63	338	5	15
3	203.87	19.67	58	5	15
4	203.87	19.67	61	5	15
5	203.8	19.98	58	5	15
6	203.8	19.97	65	5	15
7	204.03	20.01	82	5	15
9	203.85	19.3	57	5	15
10	203.86	19.3	37	5	15
11	203.49	19.35	0	5	15
12	203.47	19.34	0	5	15
13	203.54	19.5	3	5	15
14	203.51	19.45	9	5	15
15	204.17	19.33	20	5	15
16	204.08	19.33	48	5	15
17	203.98	19.53	7	5	15
18	203.98	19.53	7	5	15
19	203.81	19.86	2	5	15
20	203.83	19.83	1	5	15
21	203.64	19.99	39	5	15
22	203.64	19.99	36	5	15
1	203.5	19.65	29	5	30
2	203.47	19.63	23	5	30
3	203.87	19.67	6	5	30
4	203.87	19.67	13	5	30
5	203.8	19.98	11	5	30
6	203.8	19.97	11	5	30
7	204.03	20.01	10	5	30
9	203.85	19.3	11	5	30
10	203.86	19.3	5	5	30
11	203.49	19.35	0	5	30
12	203.47	19.34	0	5	30
13	203.54	19.5	1	5	30
14	203.51	19.45	0	5	30
15	204.17	19.33	5	5	30
16	204.08	19.33	7	5	30
17	203.98	19.53	19	5	30
18	203.98	19.53	15	5	30
19	203.81	19.86	0	5	30
20	203.83	19.83	0	5	30
21	203.64	19.99	15	5	30
22	203.64	19.99	4	5	30
1	203.5	19.65	7	5	45
2	203.47	19.63	6	5	45
3	203.87	19.67	1	5	45
4	203.87	19.67	1	5	45
5	203.8	19.98	0	5	45
6	203.8	19.97	0	5	45
7	204.03	20.01	2	5	45
9	203.85	19.3	5	5	45
10	203.86	19.3	2	5	45
11	203.49	19.35	0	5	45
12	203.47	19.34	0	5	45
13	203.54	19.5	0	5	45
14	203.51	19.45	0	5	45
15	204.17	19.33	3	5	45
16	204.08	19.33	2	5	45
17	203.98	19.53	7	5	45
18	203.98	19.53	6	5	45
19	203.81	19.86	0	5	45
20	203.83	19.83	0	5	45
21	203.64	19.99	5	5	45
22	203.64	19.99	5	5	45
1	203.5	19.65	24	5	60
2	203.47	19.63	28	5	60
3	203.87	19.67	9	5	60
4	203.87	19.67	16	5	60
5	203.8	19.98	17	5	60
6	203.8	19.97	19	5	60
7	204.03	20.01	17	5	60
9	203.85	19.3	12	5	60
10	203.86	19.3	11	5	60
11	203.49	19.35	0	5	60
12	203.47	19.34	0	5	60
13	203.54	19.5	0	5	60
14	203.51	19.45	0	5	60
15	204.17	19.33	7	5	60
16	204.08	19.33	4	5	60
17	203.98	19.53	14	5	60
18	203.98	19.53	6	5	60
19	203.81	19.86	0	5	60
20	203.83	19.83	0	5	60
21	203.64	19.99	6	5	60
22	203.64	19.99	4	5	60
1	203.5	19.65	19	5	75
2	203.47	19.63	13	5	75
3	203.87	19.67	8	5	75
4	203.87	19.67	12	5	75
5	203.8	19.98	9	5	75
6	203.8	19.97	3	5	75
7	204.03	20.01	17	5	75
9	203.85	19.3	6	5	75
10	203.86	19.3	11	5	75
11	203.49	19.35	0	5	75
12	203.47	19.34	0	5	75
13	203.54	19.5	0	5	75
14	203.51	19.45	0	5	75
15	204.17	19.33	9	5	75
16	204.08	19.33	6	5	75
17	203.98	19.53	6	5	75
18	203.98	19.53	5	5	75
19	203.81	19.86	0	5	75
20	203.83	19.83	0	5	75
21	203.64	19.99	4	5	75
22	203.64	19.99	2	5	75
